# Supplementary material for: Metal-cation substitutions induced the enhancement of second harmonic generation in A8BS6 (A = Cu, and Ag; B = Si, Ge, and Sn)
Source: Royal Society of Chemistry journal article supplement (doi:10.1039/c8nj06270f), 2019-01-01
Supplement: c8nj06270f1.pdf [file c8nj06270f1.pdf]

## **Electronic Supplementary Information for:**

**Metal-Cation Substitutions Induced the Enhancement of Second**

**Harmonic Generation in  $A_8BS_6$  (A = Cu, Ag; B = Si, Ge, Sn)**

Le Gao,<sup>a</sup> Ming-Hsien Lee<sup>b</sup>, Jun Zhang<sup>a,\*</sup>

School of Physics Science and Technology, Xinjiang University, Urumqi, Xinjiang

830046, China

\*Corresponding authors: zhangjunxju@163.com

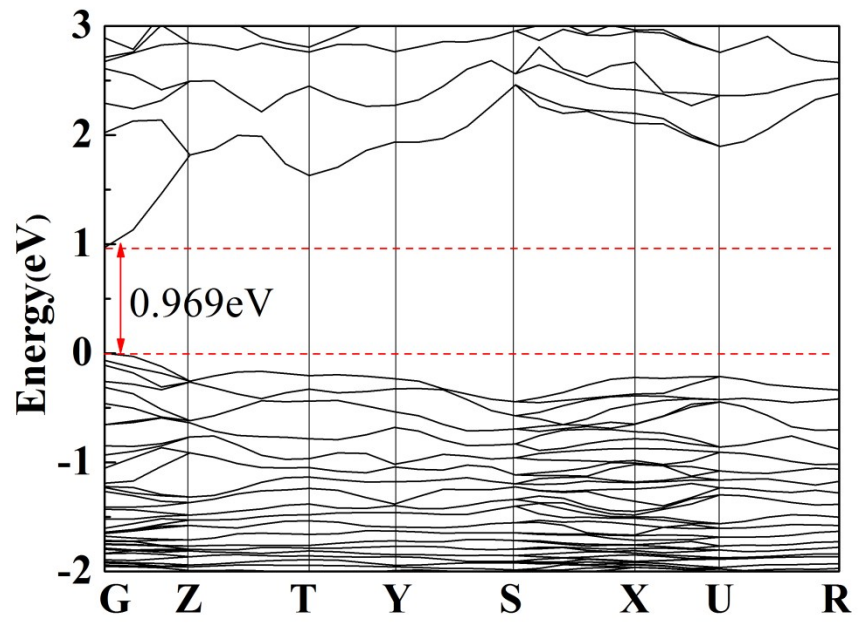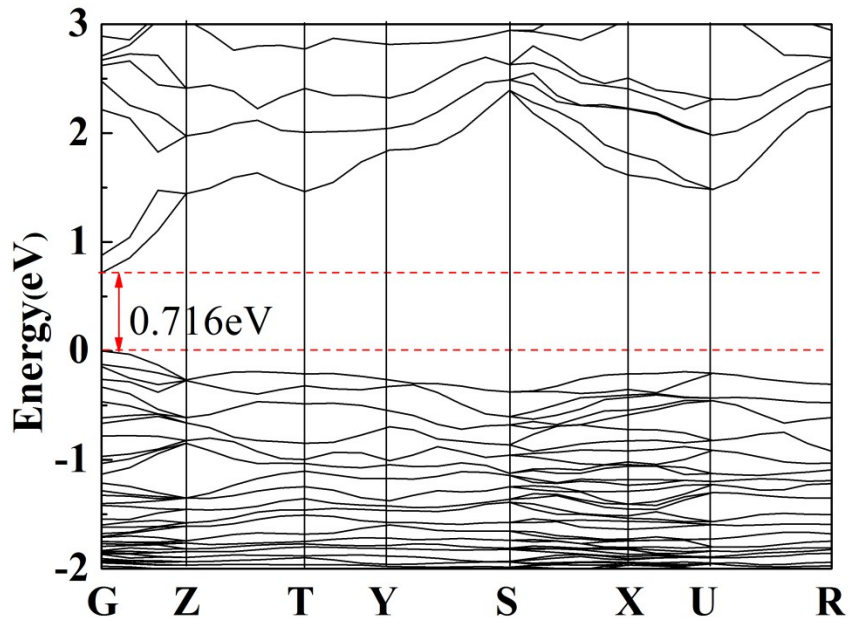

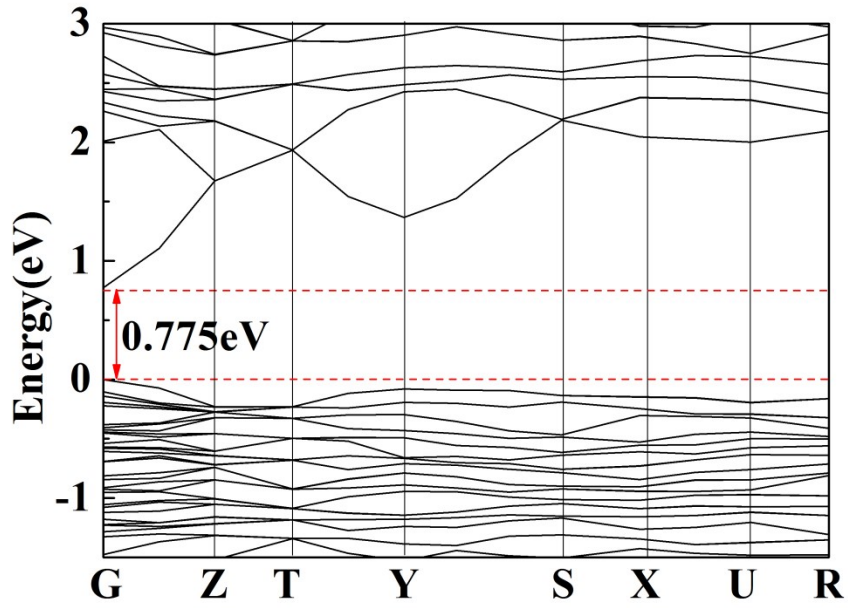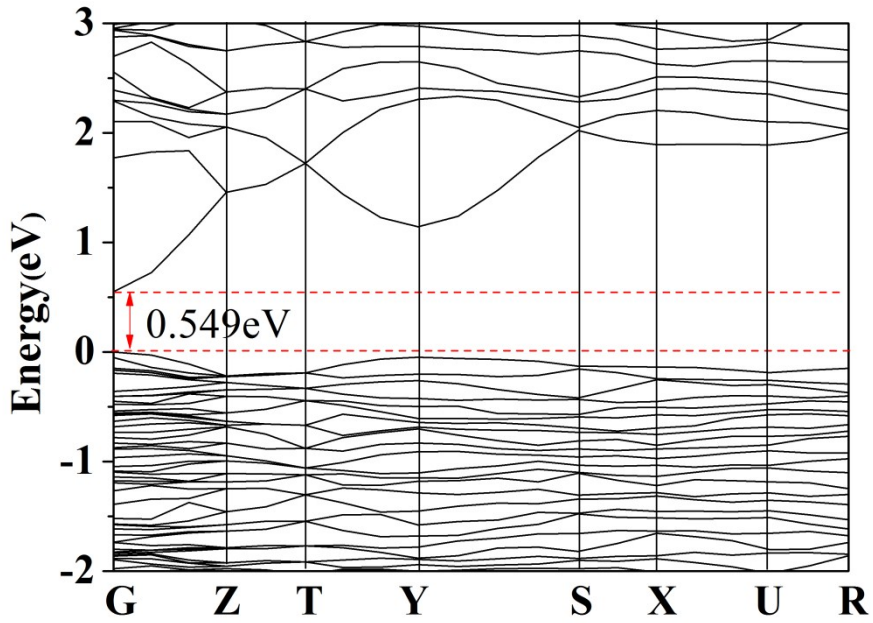

**Fig S1** Band structures of  $\text{Cu}_8\text{SiS}_6$ ,  $\text{Cu}_8\text{GeS}_6$ ,  $\text{Ag}_8\text{GeS}_6$  and  $\text{Ag}_8\text{SnS}_6$  calculated along selected high symmetry k-points, Their band structures are qualitatively similar to one another with direct band gap.

**Table 1** Crystallographic structural data of compounds  $\text{Cu}_8\text{SiS}_6$ ,  $\text{Cu}_8\text{GeS}_6$ ,  $\text{Ag}_8\text{GeS}_6$  and  $\text{Ag}_8\text{SnS}_6$

|                                                | $\text{Cu}_8\text{SiS}_6$ [1] | $\text{Cu}_8\text{GeS}_6$ [2] | $\text{Ag}_8\text{GeS}_6$ [3] | $\text{Ag}_8\text{SnS}_6$ [4] |
|------------------------------------------------|-------------------------------|-------------------------------|-------------------------------|-------------------------------|
| <i>fw</i>                                      | 728.45                        | 772.98                        | 1127.51                       | 1,173.59                      |
| Space group                                    | <i>Pmn2</i> <sub>1</sub>      | <i>Pmn2</i> <sub>1</sub>      | <i>Pna2</i> <sub>1</sub>      | <i>Pna2</i> <sub>1</sub>      |
| <i>a</i> (Å)                                   | 6.992(2)                      | 7.0445(3)                     | 15.149(1)                     | 15.298(2)                     |
| <i>b</i> (Å)                                   | 6.901(2)                      | 6.9661(3)                     | 7.476(2)                      | 7.548(2)                      |
| <i>c</i> (Å)                                   | 9.768(2)                      | 9.8699(5)                     | 10.589(1)                     | 10.699(2)                     |
| $\beta$ (°)                                    | 90                            | 90                            | 90                            | 90                            |
| <i>V</i> (Å <sup>3</sup> )                     | 471.32                        | 484.34                        | 1199.25                       | 1235.41                       |
| <i>Z</i>                                       | 2                             | 2                             | 4                             | 4                             |
| <i>D</i> <sub>calc</sub> (g·cm <sup>-3</sup> ) | 5.14                          | 5.30                          | 6.25                          | 6.31                          |
| <i>R</i> <sub>1</sub> ( $F_o > 4\sigma(F_o)$ ) | /                             | 0.087                         | 0.082                         | /                             |

$$R_1 = \frac{\sum ||F_o| - |F_c||}{\sum |F_o|}$$

Reference

[1] W.F. Kuhs, R Nitsche, Materials Research Bulletin 1979, 14, 241-248.

[2] M. Onoda, X.-A. Chen, K. Kato, H. Wada, Acta Crystallographica, Section B: Structural Science 1999, 55, 721-725.

[3] G. Eulenberger, Monatshefte fuer Chemie 1977, 108,901-913.

[4] N, Wang. Neues Jahrbuch fuer Mineralogie, Monatshefte 1978, 1978, 269-272.

**Table S2** Local dipolemoment calculation for  $\text{Cu}_8\text{SiS}_6$ ,  $\text{Cu}_8\text{GeS}_6$ ,  $\text{Ag}_8\text{GeS}_6$  and  $\text{Ag}_8\text{SnS}_6$

| Compound                  | species                        | x(a) | y (b) | z (c) | deby  |
|---------------------------|--------------------------------|------|-------|-------|-------|
| $\text{Cu}_8\text{SiS}_6$ | $\text{SiS}_4$                 | 0    | 0     | 8.45  | 10.26 |
|                           | $\text{Cu}(1)\text{S}_3$       | 0    | 0     | -0.04 | 8.42  |
|                           | $\text{Cu}(3)\text{S}_3$       | 0    | 0     | 2.19  | 12.61 |
|                           | $\text{Cu}(5)\text{S}_3$       | 0    | 0.86  | 5.64  | 6.20  |
|                           | $\text{Cu}(2)\text{S}_4$       | 0    | 0     | -8.21 | 12.54 |
|                           | $\text{Cu}(4)\text{S}_4$       | 0    | 0     | -6.13 | 8.02  |
|                           | $[\text{Cu S}]_{\text{total}}$ | 0    | 0.86  | 1.9   | 58.05 |
| $\text{Cu}_8\text{GeS}_6$ | $\text{GeS}_4$                 | 0    | -0.94 | 9.11  | 9.30  |

|                                  |                         |   |      |       |       |
|----------------------------------|-------------------------|---|------|-------|-------|
|                                  | Cu(1)S <sub>3</sub>     | 0 | 0    | -0.15 | 9.78  |
|                                  | Cu(3)S <sub>3</sub>     | 0 | 0    | 4.41  | 12.70 |
|                                  | Cu(5)S <sub>3</sub>     | 0 | 0.40 | 6.32  | 6.43  |
|                                  | Cu(2)S <sub>4</sub>     | 0 | 0    | -7.55 | 13.23 |
|                                  | Cu(4)S <sub>4</sub>     | 0 | 1.85 | -7.26 | 9.14  |
|                                  | [Cu S] <sub>total</sub> | 0 | 1.31 | 4.88  | 60.58 |
| Ag <sub>8</sub> GeS <sub>6</sub> | GeS <sub>4</sub>        | 0 | 0    | 3.31  | 3.76  |
|                                  | Ag(8)S <sub>2</sub>     | 0 | 0    | -4.87 | 6.06  |
|                                  | Ag(1)S <sub>3</sub>     | 0 | 0    | -1.10 | 1.60  |
|                                  | Ag(2)S <sub>3</sub>     | 0 | 0    | -1.65 | 4.28  |
|                                  | Ag(6)S <sub>3</sub>     | 0 | 0    | -0.20 | 6.64  |
|                                  | Ag(3)S <sub>4</sub>     | 0 | 0    | 3.95  | 11.48 |
|                                  | Ag(4)S <sub>4</sub>     | 0 | 0    | -6.95 | 12.77 |
|                                  | Ag(5)S <sub>4</sub>     | 0 | 0    | 7.53  | 13.74 |
|                                  | Ag(7)S <sub>4</sub>     | 0 | 0    | -5.71 | 6.51  |
|                                  | [Ag S] <sub>total</sub> | 0 | 0    | -5.69 | 66.84 |
| Ag <sub>8</sub> SnS <sub>6</sub> | SnS <sub>4</sub>        | 0 | 0    | 1.41  | 1.95  |
|                                  | Ag(8)S <sub>2</sub>     | 0 | 0    | 2.99  | 3.81  |
|                                  | Ag(4)S <sub>3</sub>     | 0 | 0    | 10.28 | 15.43 |
|                                  | Ag(5)S <sub>3</sub>     | 0 | 0    | -1.06 | 6.94  |
|                                  | Ag(7)S <sub>3</sub>     | 0 | 0    | 2.17  | 5.90  |
|                                  | Ag(1)S <sub>4</sub>     | 0 | 0    | -5.70 | 12.62 |
|                                  | Ag(2)S <sub>4</sub>     | 0 | 0    | 5.70  | 6.66  |
|                                  | Ag(3)S <sub>4</sub>     | 0 | 0    | 7.24  | 12.37 |
|                                  | Ag(6)S <sub>4</sub>     | 0 | 0    | -3.36 | 12.06 |
|                                  | [Ag S] <sub>total</sub> | 0 | 0    | 19.67 | 77.74 |

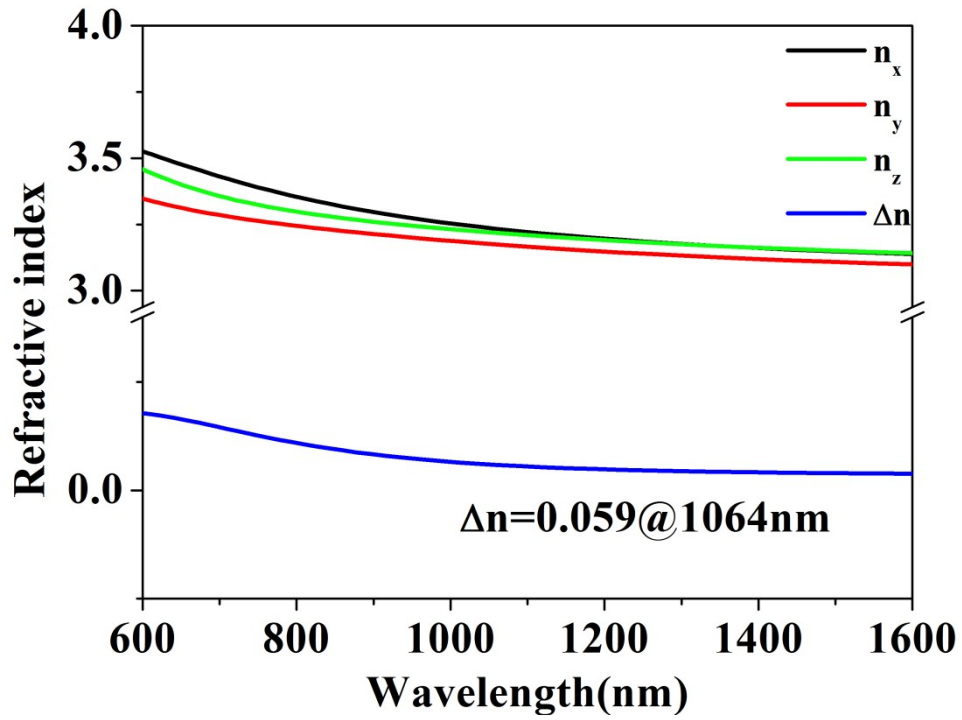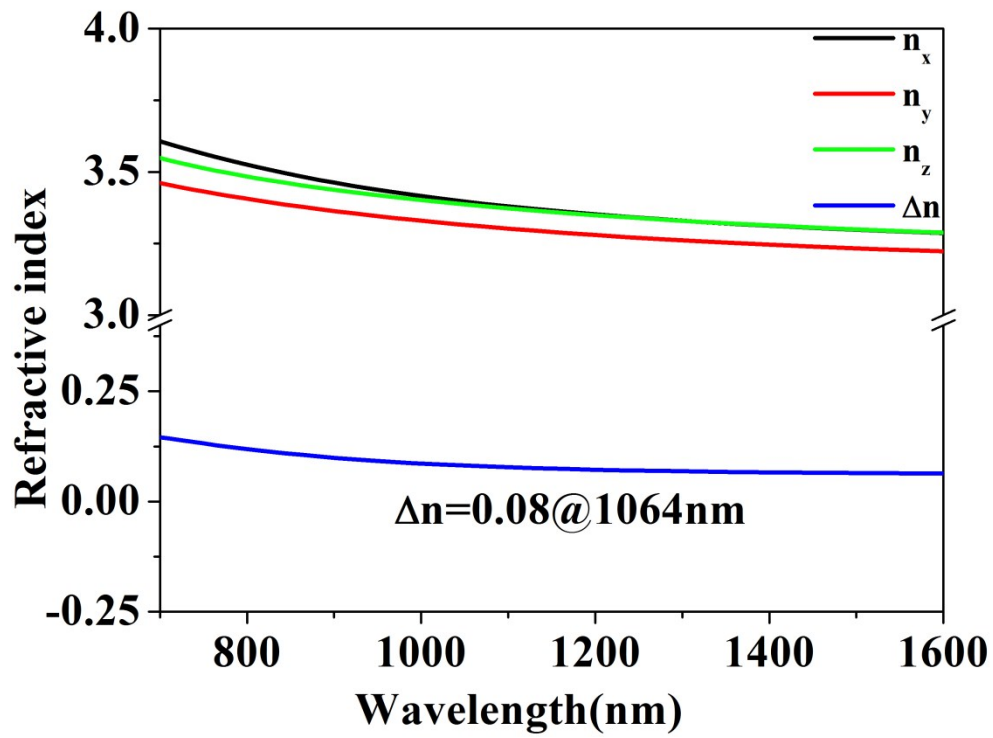

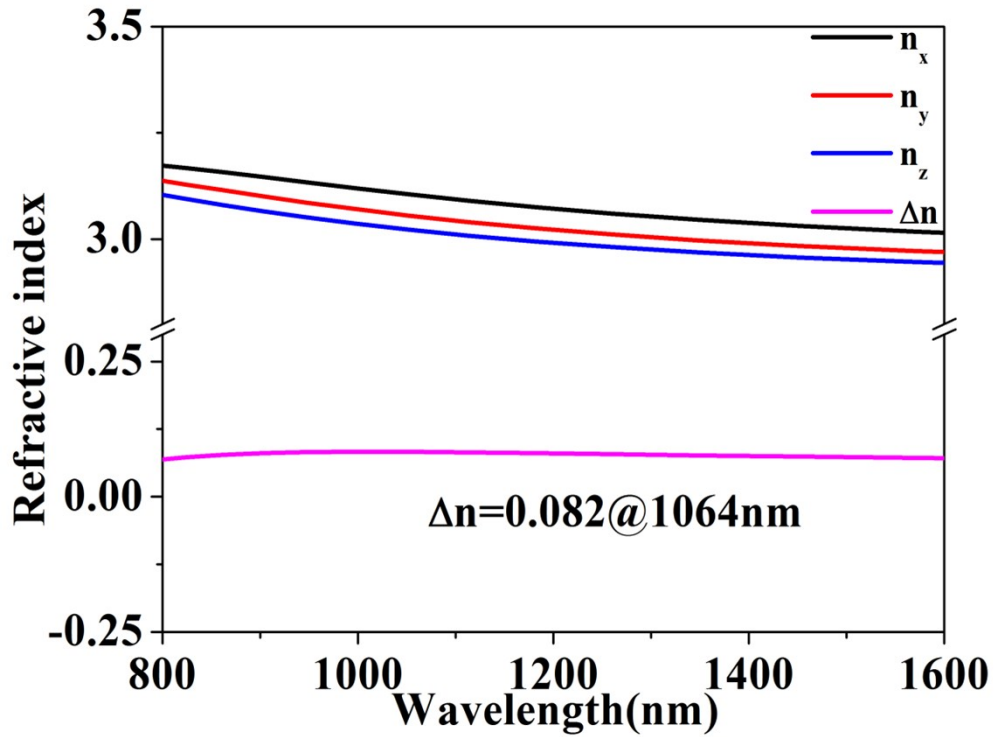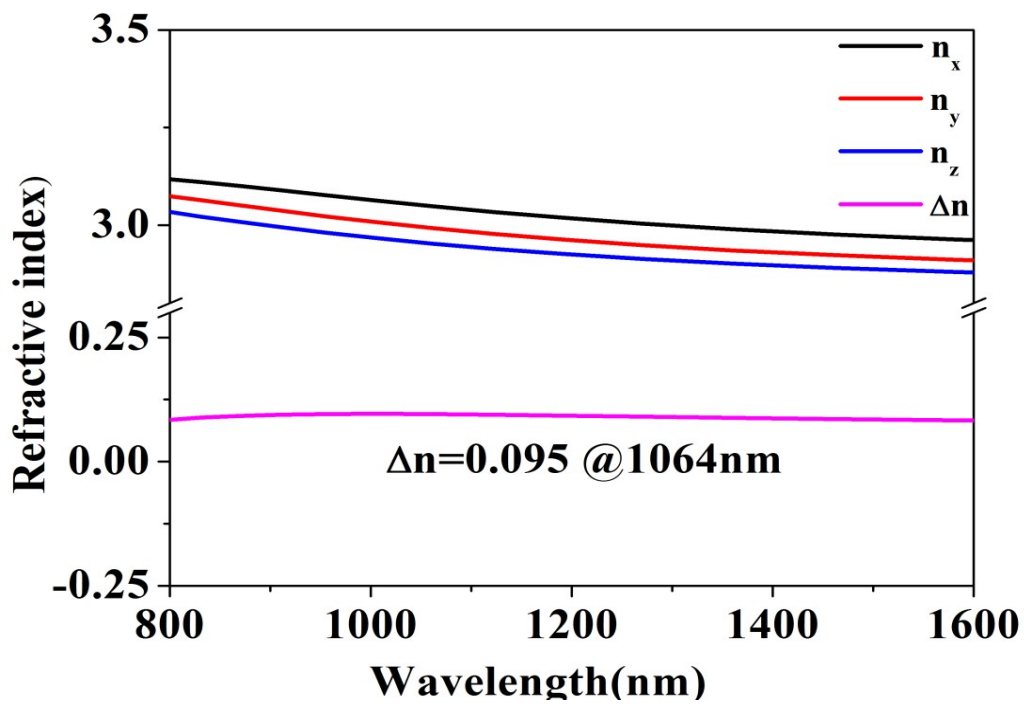

**Fig S2** The calculated dispersion curves of birefringence of  $\text{Cu}_8\text{SiS}_6$ ,  $\text{Cu}_8\text{GeS}_6$ ,  $\text{Ag}_8\text{GeS}_6$  and  $\text{Ag}_8\text{SnS}_6$

**Table S3** Mulliken population, ionic radii, bond length and volume for  $\text{Cu}_8\text{SiS}_6$ ,  $\text{Cu}_8\text{GeS}_6$ ,  $\text{Ag}_8\text{GeS}_6$ ,  $\text{Ag}_8\text{SnS}_6$

| compound | atom | bond | Bond length | Population | volume( $\text{\AA}^3$ ) | ionic radii |
|----------|------|------|-------------|------------|--------------------------|-------------|
|----------|------|------|-------------|------------|--------------------------|-------------|

|                                    |    |      |             |           |         |        |
|------------------------------------|----|------|-------------|-----------|---------|--------|
| Cu <sub>8</sub> SiS <sub>6</sub>   | Cu | Cu-S | 2.242-2.648 | 0.13-0.45 | 471.52  | 0.73 Å |
|                                    | Si | Si-S | 2.076-2.158 | 0.63-0.73 |         | 0.40 Å |
|                                    | S  | /    | /           | /         |         |        |
| Cu <sub>8</sub> GeS <sub>6</sub>   | Cu | Cu-S | 2.232-2.598 | 0.24-0.61 | 484.34  | 0.73 Å |
|                                    | Ge | Ge-S | 2.225-2.249 | 0.44-0.53 |         | 0.53 Å |
|                                    | S  | /    | /           | /         |         |        |
| Ag <sub>8</sub> GeS <sub>6</sub> , | Ag | Ag-S | 2.372-2.786 | 0.17-0.41 | 1174.46 | 1.26 Å |
|                                    | Ge | Ge-S | 2.105-2.142 | 0.54-0.62 |         | 0.53 Å |
|                                    | S  | /    | /           | /         |         |        |
| Ag <sub>8</sub> SnS <sub>6</sub>   | Ag | Ag-S | 2.440-2.797 | 0.16-0.41 | 1235.41 | 1.26 Å |
|                                    | Sn | Sn-S | 2.221-2.249 | 0.58-0.66 |         | 0.69 Å |
|                                    | S  | /    | /           | /         |         |        |
